# Supplementary material for: Individualized cyclic mechanical loading improves callus properties during the remodelling phase of fracture healing in mice as assessed from time-lapsed in vivo imaging
Source: PubMed Central journal article supplement (PMC8630002; doi:10.1038/s41598-021-02368-y), 2021-11-29
Supplement: 41598_2021_2368_MOESM1_ESM.pdf [file 41598_2021_2368_MOESM1_ESM.pdf]

**Individualized cyclic mechanical loading improves callus properties during the remodelling phase of fracture healing in mice as assessed from time-lapsed *in vivo* imaging**

Esther Wehrle<sup>1\*</sup>, Graeme R Paul<sup>1</sup>, Duncan C Tourolle né Betts<sup>1</sup>, Gisela A Kuhn<sup>1</sup>, Ralph Müller<sup>1\*</sup>

<sup>1</sup> Institute for Biomechanics, ETH Zurich, Zurich, Switzerland.

**Corresponding authors:**

Esther Wehrle, PhD, DVM

Institute for Biomechanics, ETH Zurich

Leopold-Ruzicka-Weg 4

8093 Zurich, Switzerland

Email: [esther.wehrle@hest.ethz.ch](mailto:esther.wehrle@hest.ethz.ch)

Ralph Müller, PhD

Institute for Biomechanics, ETH Zurich

Leopold-Ruzicka-Weg 4

8093 Zurich, Switzerland

Email: [ram@ethz.ch](mailto:ram@ethz.ch)

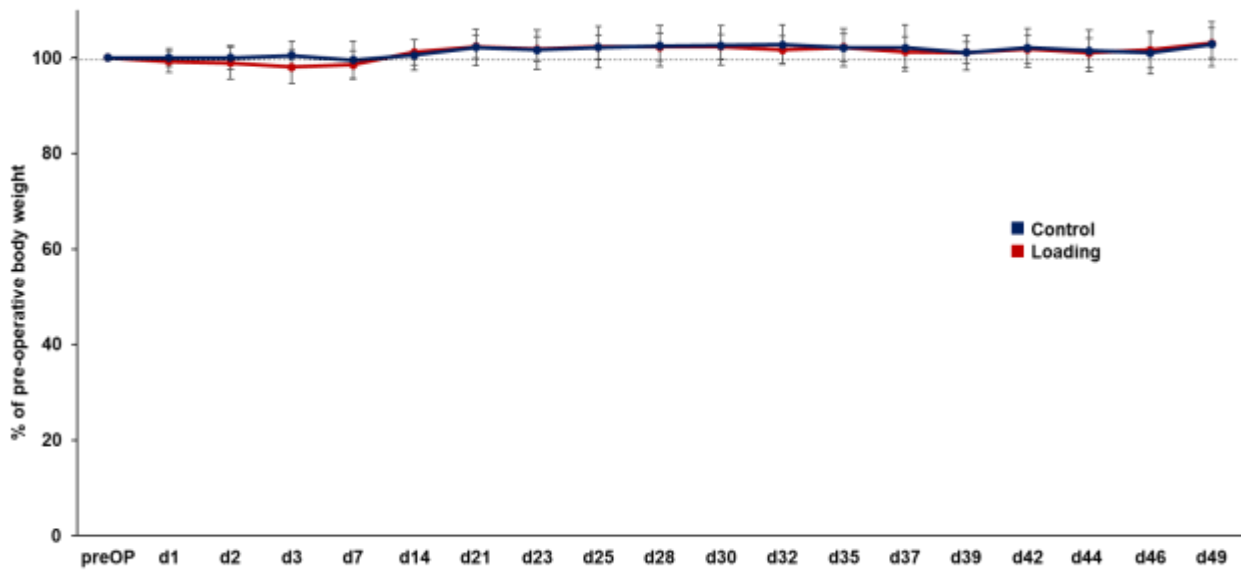

**Supplementary Fig. S1.** *In vivo* monitoring of body weight of the mice from the control group (n=10) and the loading group (n=10) measured pre-operatively (preOP), on postoperative days 1-3, weekly from day 7 to day 14 and 3x/week during the loading period (day 21 - day 49). The postoperative values were related to the preoperative data.

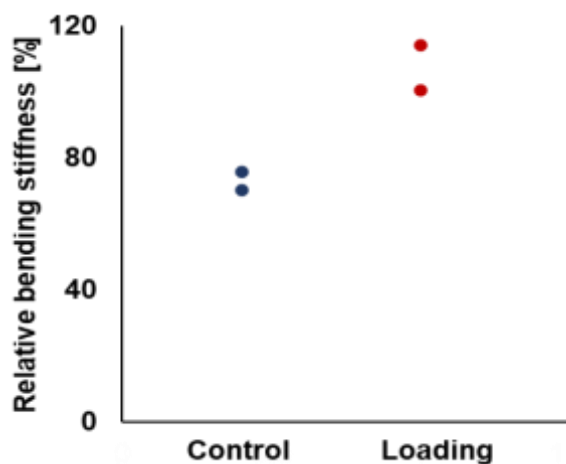

**Supplementary Fig. S2.** Relative bending stiffness (healed femur vs. contralateral femur) was assessed via *ex vivo* 3-point-bending testing for two animals from the loading and the control group.

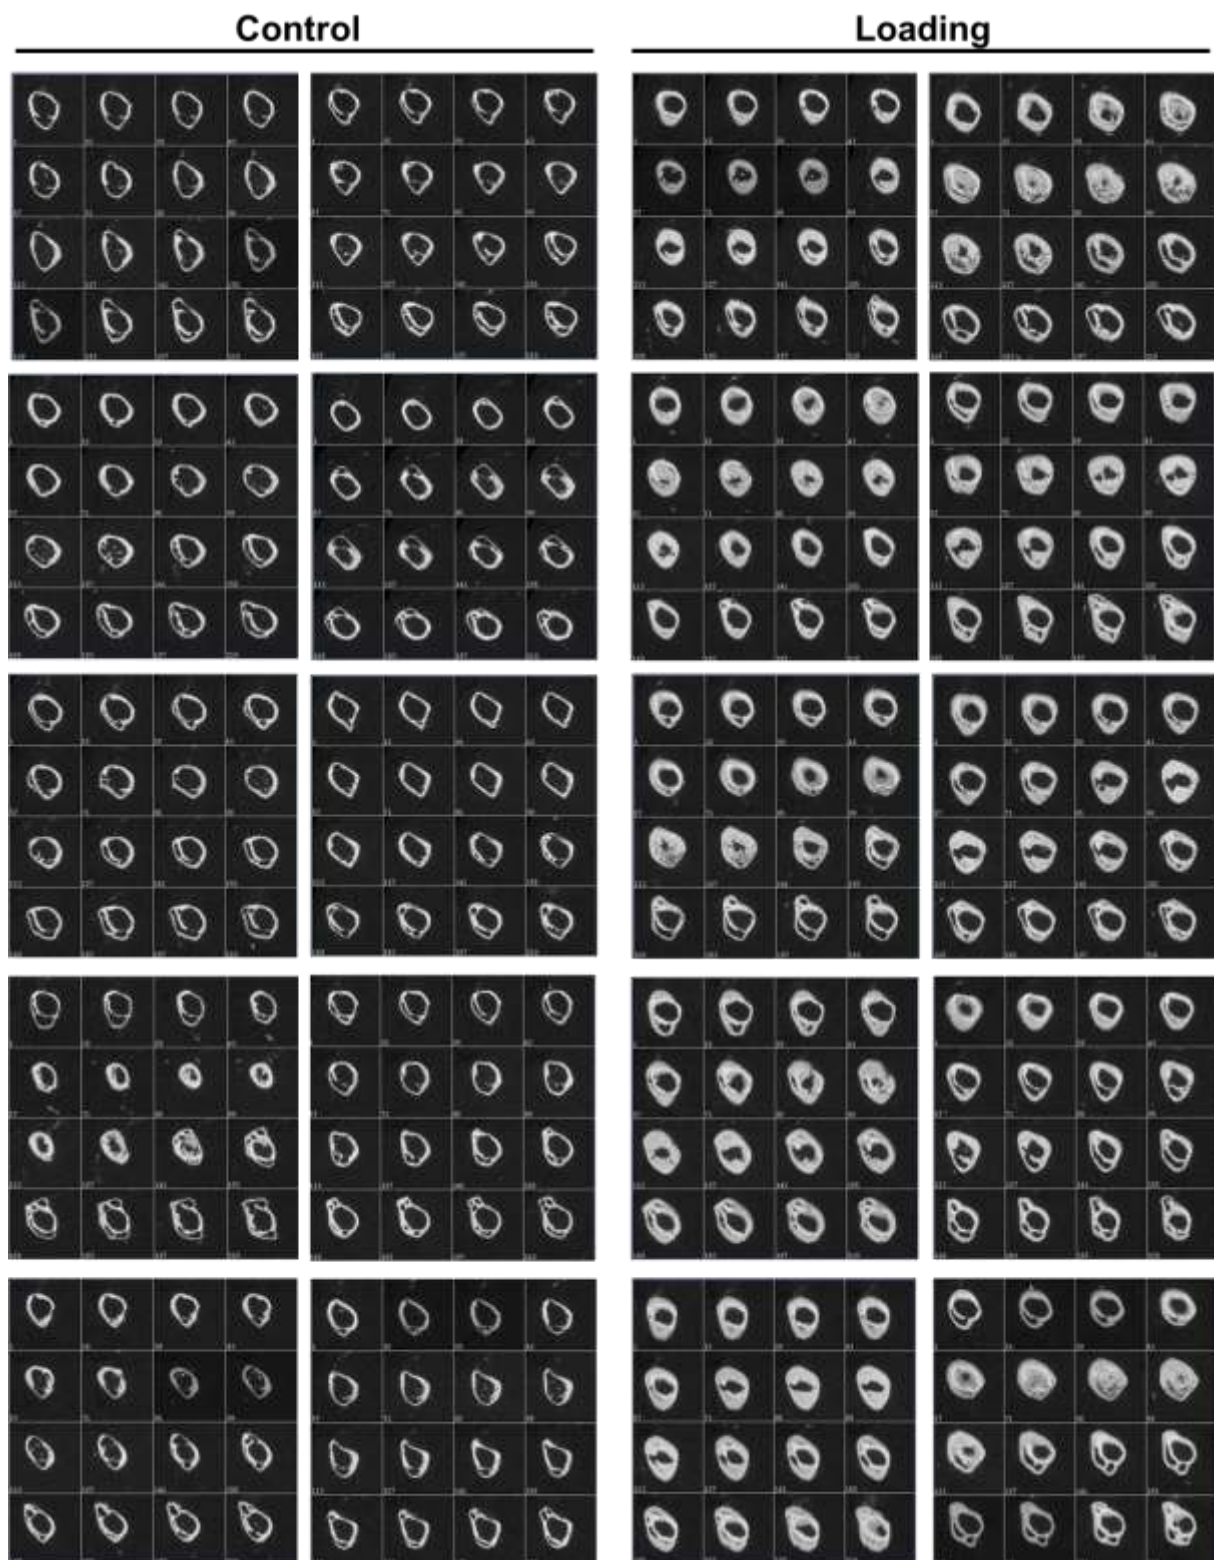

**Supplementary Fig. S3.** *In vivo* micro-CT scans of all 10 mice from the control and the loading group at day 49 post-osteotomy. For each animal 16 cross-sections of the mineralized tissue within the total VOI are shown. The distance between cross-sections is 147  $\mu\text{m}$ .

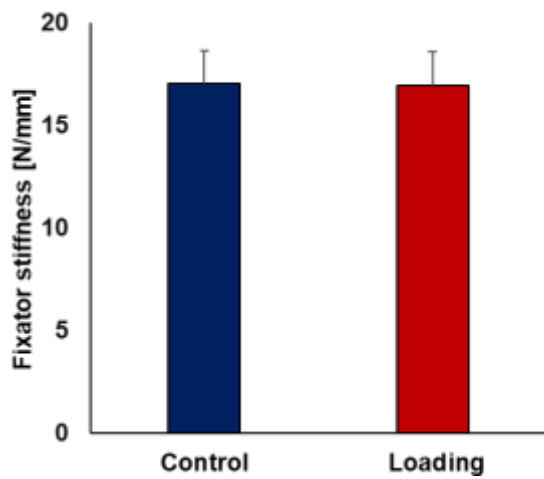

**Supplementary Fig. S4.** Pre-operative measurements of fixator stiffness were used to assign fixators to the loading group (n=10) and the control group (n=10).

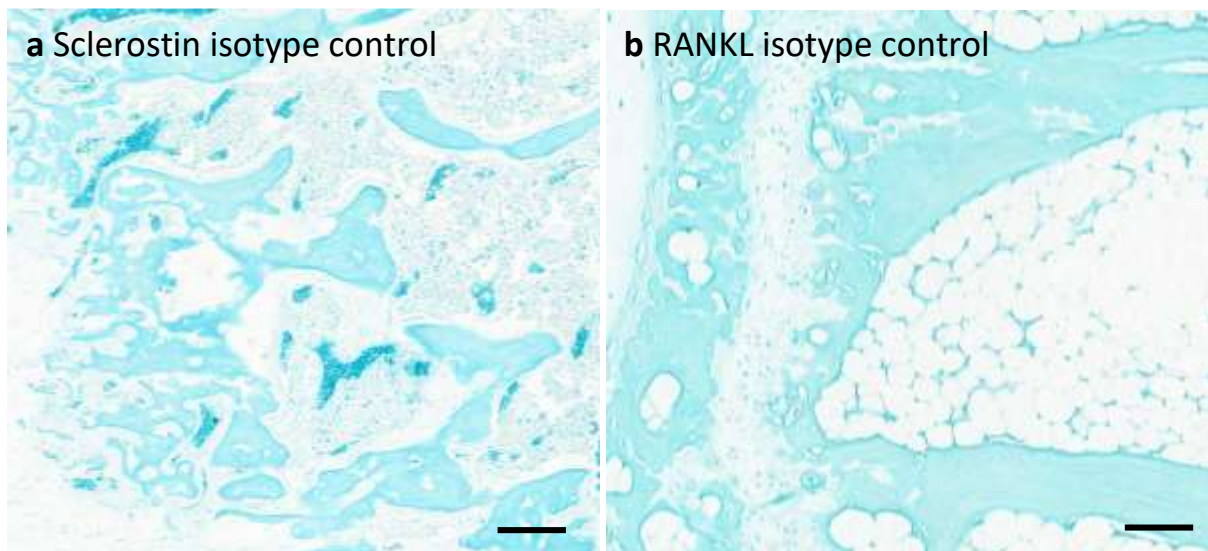

**Supplementary Fig. S5.** Images of isotype controls for Sclerostin and RANKL immunohistochemical stainings. a. Sclerostin isotype control, b. RANKL isotype control. Scale bar = 100  $\mu$ m.

**Supplementary Table S1.** Study design (female 20 week-old C57BL/6J mice)

| Group   | Femur defect<br>saw size: 0.66mm | <i>In vivo</i> micro-CT<br>measurements | Registration of<br>micro-CT scans # | Loading                                     | Histology       |
|---------|----------------------------------|-----------------------------------------|-------------------------------------|---------------------------------------------|-----------------|
| Control | n=10                             | d0, week 1-7<br>(n=10)                  | week 1-7<br>(n=10)                  | 0N,<br>3/week, week 3-7<br>(n=10)           | week 7<br>(n=1) |
| Loading | n=10                             | d0, week 1-7<br>(n=10)                  | week 1-7<br>(n=10)                  | 8-16N, 10 Hz,<br>3/week, week 3-7<br>(n=10) | week 7<br>(n=1) |

# micro-CT scan taken at timepoint x registered to micro-CT scan taken at timepoint x-1
